# Supplementary material for: Assessing the climate impact of an improved volcanic sulfate aerosol representation in E3SM
Source: Copernicus journal article supplement (doi:10.5194/gmd-18-4137-2025), 2025-07-08
Supplement: Supplementary file 1 [file gmd-18-4137-2025-supplement.zip]

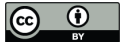

*Supplement of*

## **Assessing the climate impact of an improved volcanic sulfate aerosol representation in E3SM**

**Ziming Ke et al.**

*Correspondence to:* Ziming Ke (ke2@lnl.gov)

- gmd-18-4137-2025-supplement-title-page.pdf
- Supplement.docx

The copyright of individual parts of the supplement might differ from the article licence.
